# Supplementary material for: Whole-Genome Comparison Reveals Novel Genetic Elements That Characterize the Genome of Industrial Strains of Saccharomyces cerevisiae
Source: PLOS journal article supplement (doi:10.1371/journal.pgen.1001287), 2011-02-03
Supplement: S13 (10.1371/journal.pgen.1001287.s013) [file journal.pgen.1001287.s013]

orf00004_AWRI1685_contig437_gr --MGQNRCTKRKHKVITACKNCRNRKVKCDGSLPCFSCLQRHITCTYMIK

orf00004_00003_AWRI1684_contig --MGQNRCTKRKHKVITACKNCRNRKVKCDGSLPCFSCLQRHITCTYMIK

orf00002_YJM789_chr5_contig9_5 LIWVKISEQNESTKYYRVTKTAGNRKVKCDGSLPCFSCLQRHITCTYMIK

: :.. * . *.. ***************************

orf00004_AWRI1685_contig437_gr GDEGNLSFYKQDDHILEQIKILKKSIDILEKLKLSVVTSSEYATNAIADI

orf00004_00003_AWRI1684_contig GDEGNLSFYKQDDHILEQIKILKKSIDILEKLKLSVVTSSEYATNAIADI

orf00002_YJM789_chr5_contig9_5 GDEGKLSFYKQDDHILEQVKILKKSIDILEKLKLSVATSSEYATNAIADI

****:*************:*****************.*************

orf00004_AWRI1685_contig437_gr NRQLETLLSFQHVNINSESVRTYKDNGALENQLLDGNYVAFDAFSTFENV

orf00004_00003_AWRI1684_contig NRQLETLLSFQHVNINSESVRTYKDNGALENQLLDGNYVAFDAFSTFENV

orf00002_YJM789_chr5_contig9_5 NRQLETLLSFQHVNLNSESVRTYKDNGALENQLLGGNYVAFDAFSTFENV

**************:*******************.***************

orf00004_AWRI1685_contig437_gr SKGKAVDDIFGLYSPISVMSPKGICWLIQQLIVKSREKDTEETVYILLKF

orf00004_00003_AWRI1684_contig SKGKAVDDIFGLYSPISVMSPKGICWLIQQLIVKSREKDTEETVYILLKF

orf00002_YJM789_chr5_contig9_5 SKGKAVDVIFGLYSPISVMSPKGICWLIQQLIVKSREKDTEETVYILLKF

******* ******************************************

orf00004_AWRI1685_contig437_gr LDAGSSSYKWELIAPVYRLQFILIEFFGCKVPFTRNETLKEAIDAIPPSL

orf00004_00003_AWRI1684_contig LDAGSSSYKWELIAPVYRLQFILIEFFGCKVPFTRNETLKEAIDAIPPSL

orf00002_YJM789_chr5_contig9_5 LDAGSSSYKWELIAPVYRLQFILIEFFGCKVPFTRNQTLKEAIDAIPPSL

************************************:*************

orf00004_AWRI1685_contig437_gr RSELKEEGGNSIQDSRKLFMYCVKLLGKHFTSSRHLLRNINIFEQFFQVE

orf00004_00003_AWRI1684_contig RSELKEEGGNSIQDSRKLFMYCVKLLGKHFTSSRHLLRNINIFEQFFQVE

orf00002_YJM789_chr5_contig9_5 RSELKEEGGSSIQDSRKLFMYCVKLLGKHFTSSRHLLRNINIFEHFFQVE

*********.**********************************:*****

orf00004_AWRI1685_contig437_gr ELLSTLCYT-FLENSLNFRLLDAEFLHDLLCFVKQRHWKDNSFIIGGVIA

orf00004_00003_AWRI1684_contig ELLSTLCYTXFLENSLNFRLLDAEFLHDLLCFVKQRHWKDNSFIIGGVIA

orf00002_YJM789_chr5_contig9_5 ELLSTLCYT-LLENSLNFRLLDAEFLHDLLCFVKQRHWKDNSFIIGGVIA

********* :***************************************

orf00004_AWRI1685_contig437_gr PLCRQVQDLGLSRWEYYLGMNEEHANPLREIWWDTYWWDKWYVVVTGKLP

orf00004_00003_AWRI1684_contig PLCRQVQDLGLSRWEYYLGMNEEHANPLREIWWDTYWWDKWYVVVTGKLP

orf00002_YJM789_chr5_contig9_5 PLCRQVQDLGLSRWEYYLGMNEEHANHLREIWWDTYWWDKWYVVVTGKLP

************************** ***********************

orf00004_AWRI1685_contig437_gr MIDSSTVTCLLPQQIMRLGVDDAMSSWQMLERVDFTYGSLKDHIMFGYIV

orf00004_00003_AWRI1684_contig MIDSSTVTCLLPQQIMRLGVDDAMSSWQMLERVDFTYGSLKDHIMFGYIV

orf00002_YJM789_chr5_contig9_5 MIDSSTVTCLLPQQIMRLGVDDAMSSWQMLERVDFTYGSLKDHIMFGYIV

**************************************************

orf00004_AWRI1685_contig437_gr LSISINDVFSNVLYNRKFTDYRVFSGITALDFKVVEELLTRINGIRKGFT

orf00004_00003_AWRI1684_contig LSISINDVFSNVLYNRKFTDYRVFSGITALDFKVVEELLTRINGIRKGFT

orf00002_YJM789_chr5_contig9_5 LSISINDVFSNVLYNRKFTDYRMFSGITALDFKVVEELLTRINEIRKGFT

**********************:******************** ******

orf00004_AWRI1685_contig437_gr VLKTTVVHELEKSLLDDDVFRFCIHFAYSRISCLRAIGNLLMRFKSIFHG

orf00004_00003_AWRI1684_contig VLKTTVVHELEKSLLDDDVFRFCIHFAYSRISCLRAIGNLLMRFKSIFHG

orf00002_YJM789_chr5_contig9_5 VLKTTVVHELEKSLLDDDVFRFCIHFAYSRISCLKAIGNLLMRFKSIFHG

**********************************:***************

orf00004_AWRI1685_contig437_gr TSSNLISDQIGECDKDILQTTVETFTFILRANDNIKIKEHVRPISEMGLN

orf00004_00003_AWRI1684_contig TSSNLISDQIGECDKDILQTTVETFTFILRANDNIKIKEHVRPISEMGLN

orf00002_YJM789_chr5_contig9_5 TSSNLISDQIGEYDKDILQTTVETFTFILRANDNIKIKEHVRPISEMGLN

************ *************************************

orf00004_AWRI1685_contig437_gr ILLEAVKAPAGIDVYHISLFCGVASLFDRITCSENGAEKQYNHPGRIVLM

orf00004_00003_AWRI1684_contig ILLEAVKAPAGIDVYHISLFCGVASLFDRITCSENGAEKQYNHPGRIVLM

orf00002_YJM789_chr5_contig9_5 ILLEAVKAPAGIDVYHISLFCGVASLFDRITCSENGAEKQYNHPGRIVLM

**************************************************

orf00004_AWRI1685_contig437_gr EITCIFIFVRVCCLVYRQYKKVSKEELMAILTDFDHTTARFCNETLDIRS

orf00004_00003_AWRI1684_contig EITCIFIFVRVCCLVYRQYKKVSKEELMAILTDFDHTTARFCNETLDIRS

orf00002_YJM789_chr5_contig9_5 EITCIFIFVRVCCLVYRQYKKVSKEELMAILTDFDHTTARFCNETLDIRS

**************************************************

orf00004_AWRI1685_contig437_gr DLFQHIIRDKKKVGLS----------------------------------

orf00004_00003_AWRI1684_contig DLFQHIIRDKKKVGLS----------------------------------

orf00002_YJM789_chr5_contig9_5 DLFQHIIRDKNKSDYHRDIIHGIEKVLGRDIITTIESCEREVLSSDEYRQ

**********:* .

orf00004_AWRI1685_contig437_gr ------------------------------------------------

orf00004_00003_AWRI1684_contig ------------------------------------------------

orf00002_YJM789_chr5_contig9_5 AQYMGNVATKDLDYLRYFLNLDIFPELNTDDELWDDLKEIDKYYCSSV

**Supplemental Fig. S1** Clustal Alignment of the hypothetical, conserved gene adjacent to *RTM1* in the ale yeasts AWRI1684, AWRI1685 and the human pathogen YJM789.
